# Supplementary material
Source: Springer Nature journal article supplement (https://www.springermedizin.de/resource/supplementary/12967_2010_688_MOESM6_ESM.pdf/9577200)

**A**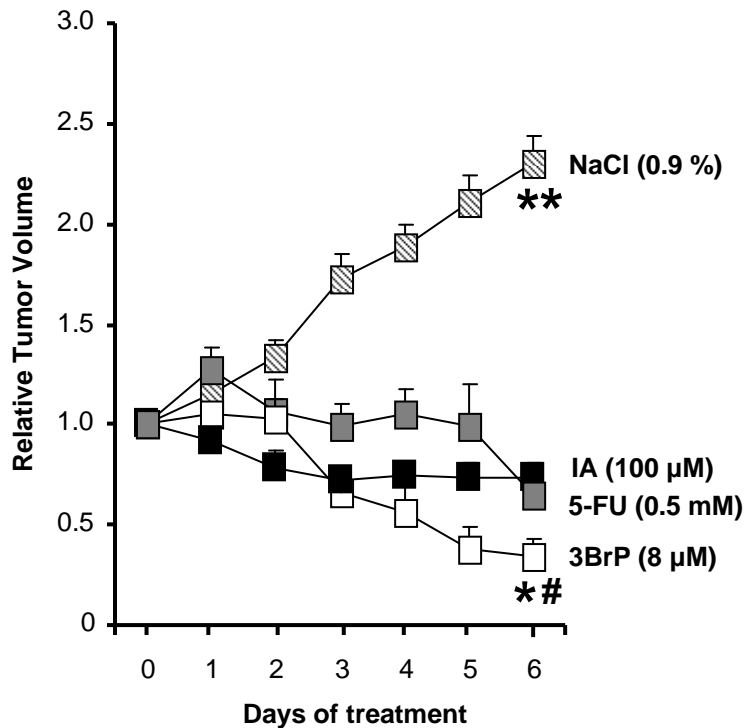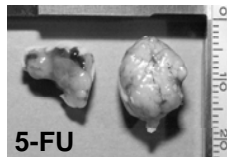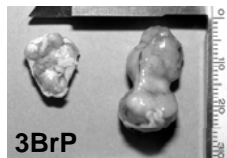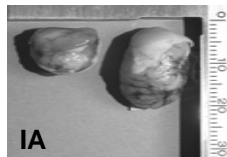**B**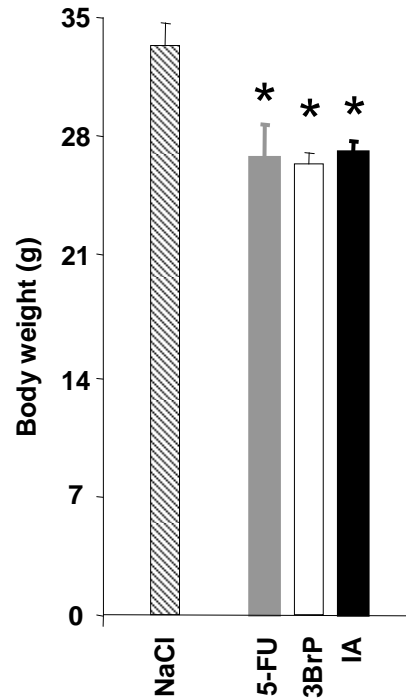

Supplement: MOESM6 [file 9577200]
